# Supplementary material
Source: Research Square preprint supplement (doi:10.21203/rs.3.rs-8989395/v1)
Supplement: Supplementary file 1 [file 3a36e986b2d3c53073d1a7ea.docx]

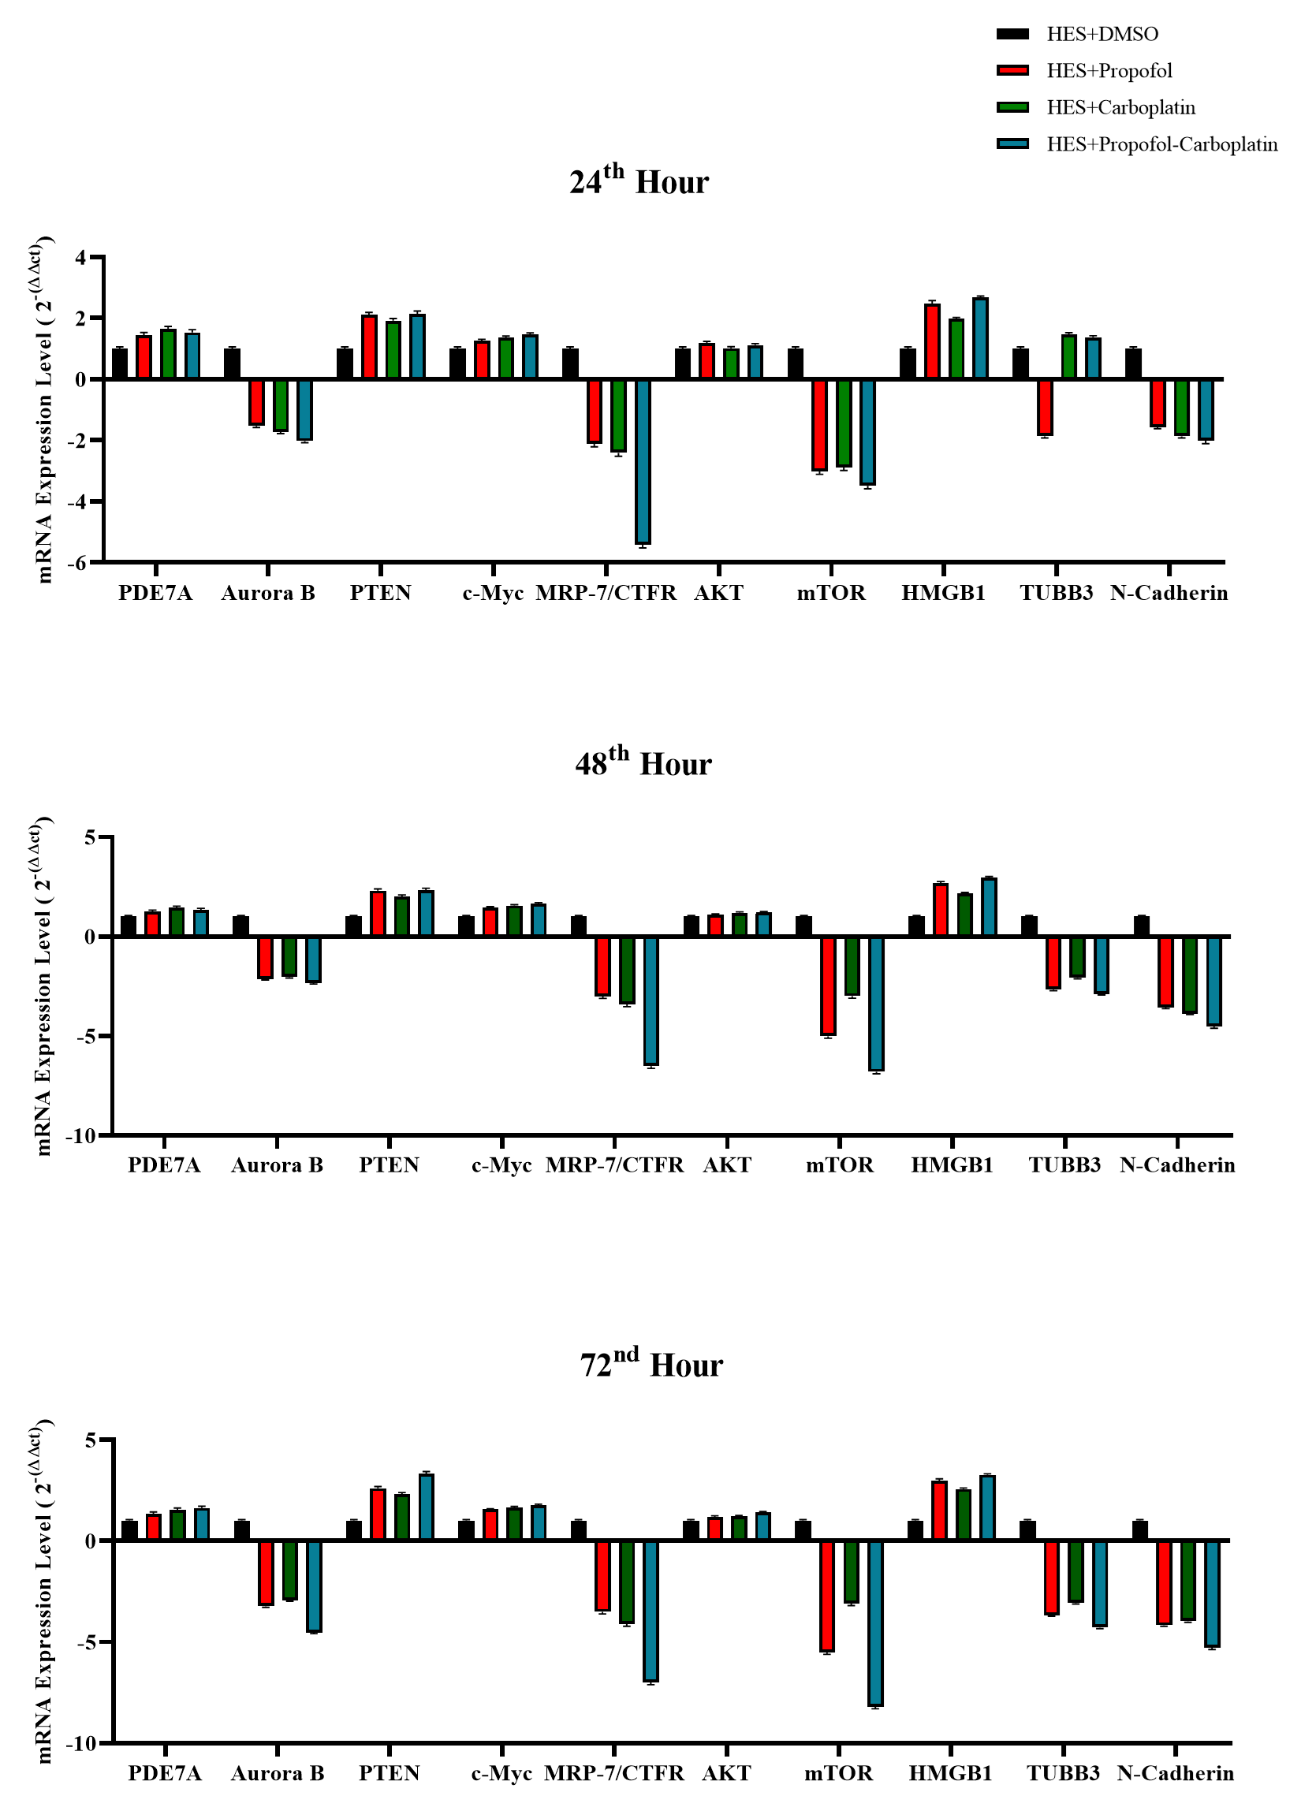


**Figure S1.** RT-qPCR analysis of gene expression in HES cells following propofol and carboplatin treatment. Time-course RT-qPCR analyses performed at 24, 48, and 72 h demonstrate treatment-associated modulation of genes involved in metastasis, drug resistance, and angiogenesis, including mTOR, c-Myc, N-Cadherin, and MRP7 (Figure S1), as well as tumor suppressor genes such as HMGB1 and PTEN.

**
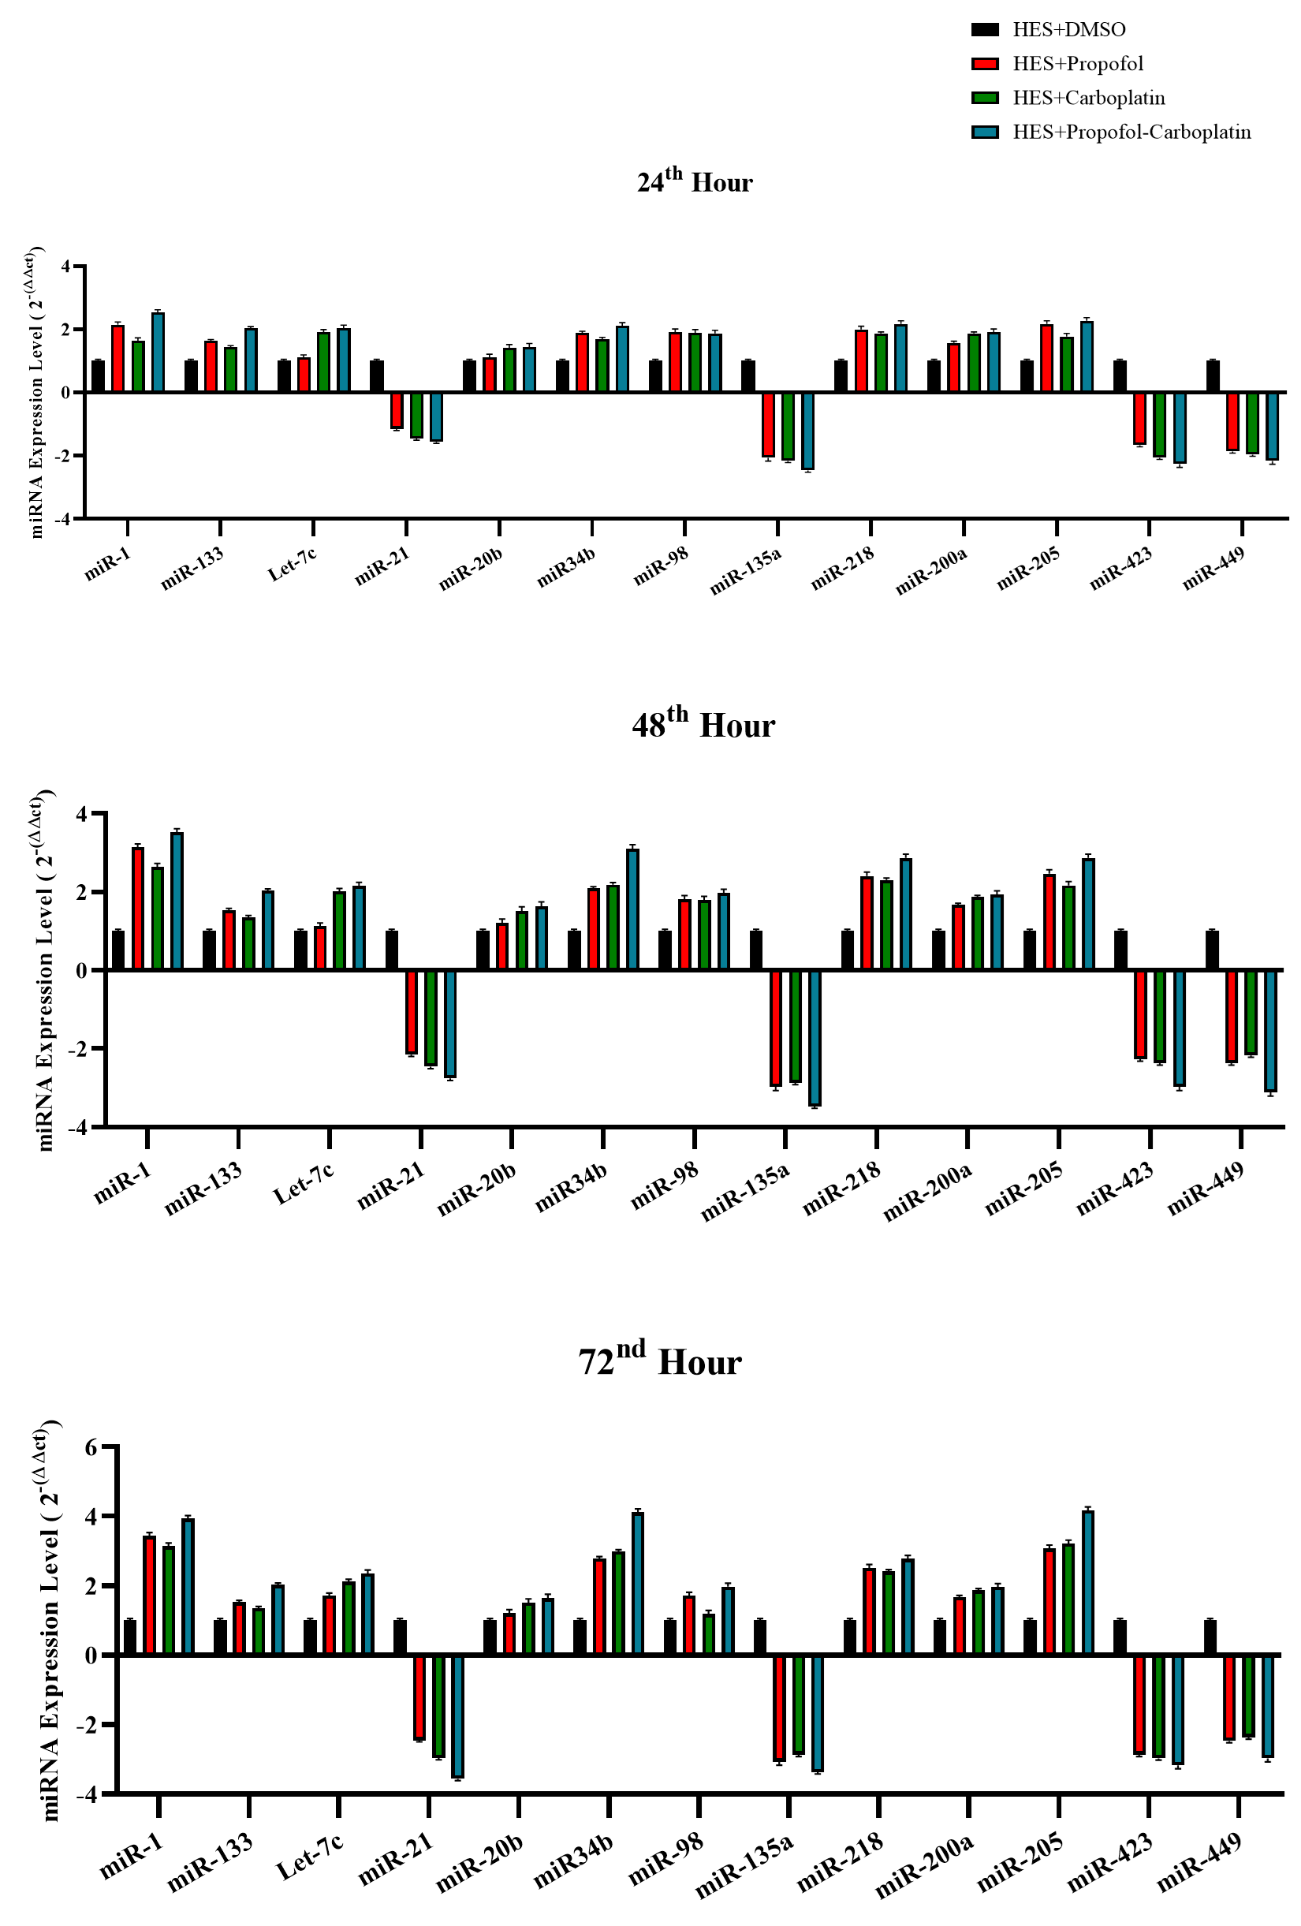
Figure S2.** RT-qPCR analysis of miRNA expression in HES cells following propofol and carboplatin treatment. Time-course RT-qPCR analyses performed at 24, 48, and 72 h demonstrate treatment-associated modulation of miRNA involved in metastasis, drug resistance, and angiogenesis (Figure S2).

**
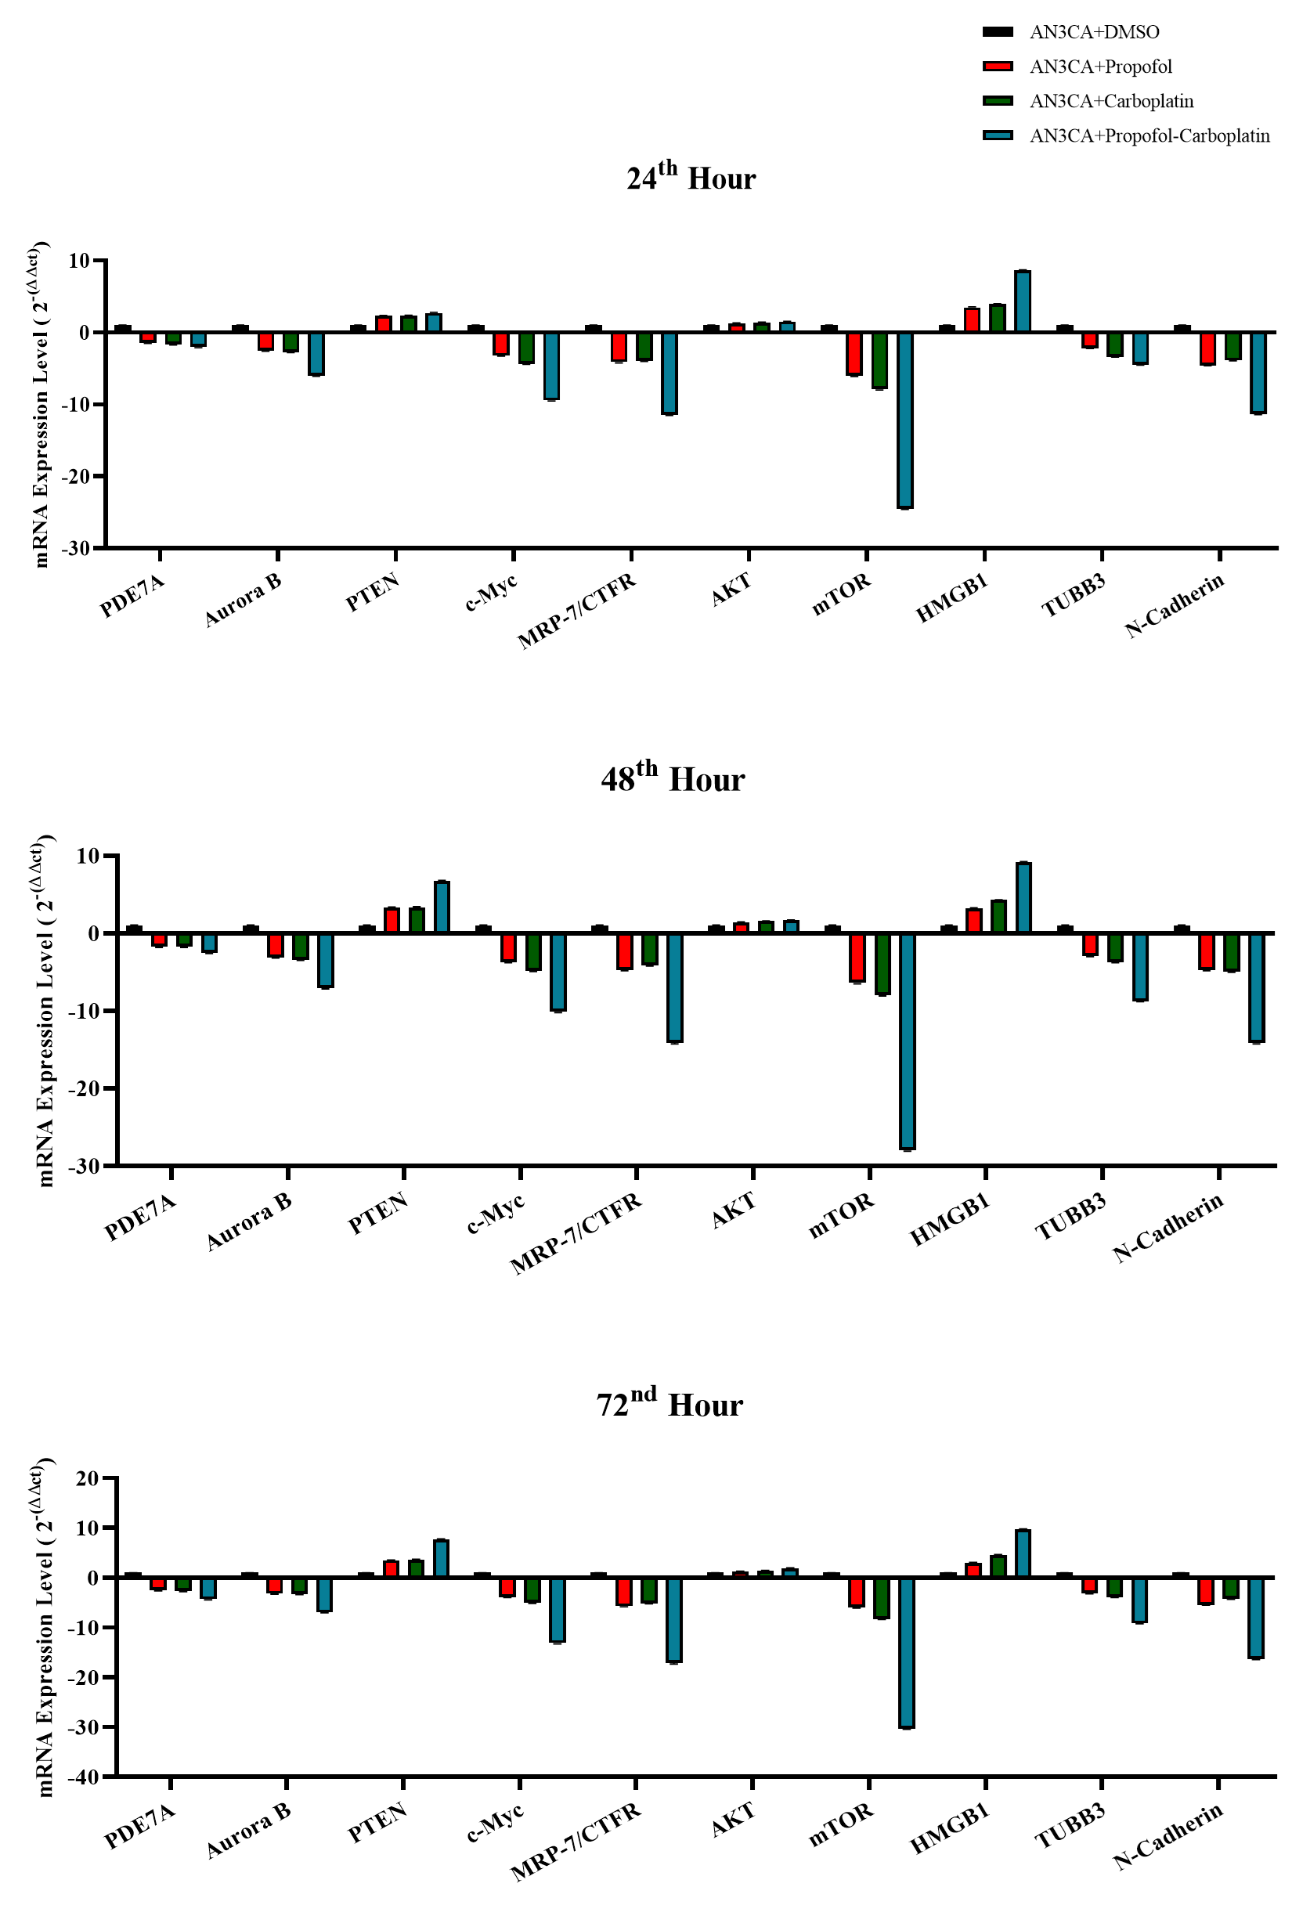
Figure S3.** RT-qPCR analysis of gene expression in AN3CA cells following propofol and carboplatin treatment. Time-course RT-qPCR analyses performed at 24, 48, and 72 h demonstrate treatment-associated modulation of genes involved in metastasis, drug resistance, and angiogenesis, including mTOR, c-Myc, N-Cadherin, and MRP7 (Figure S1), as well as tumor suppressor genes such as HMGB1 and PTEN.

**
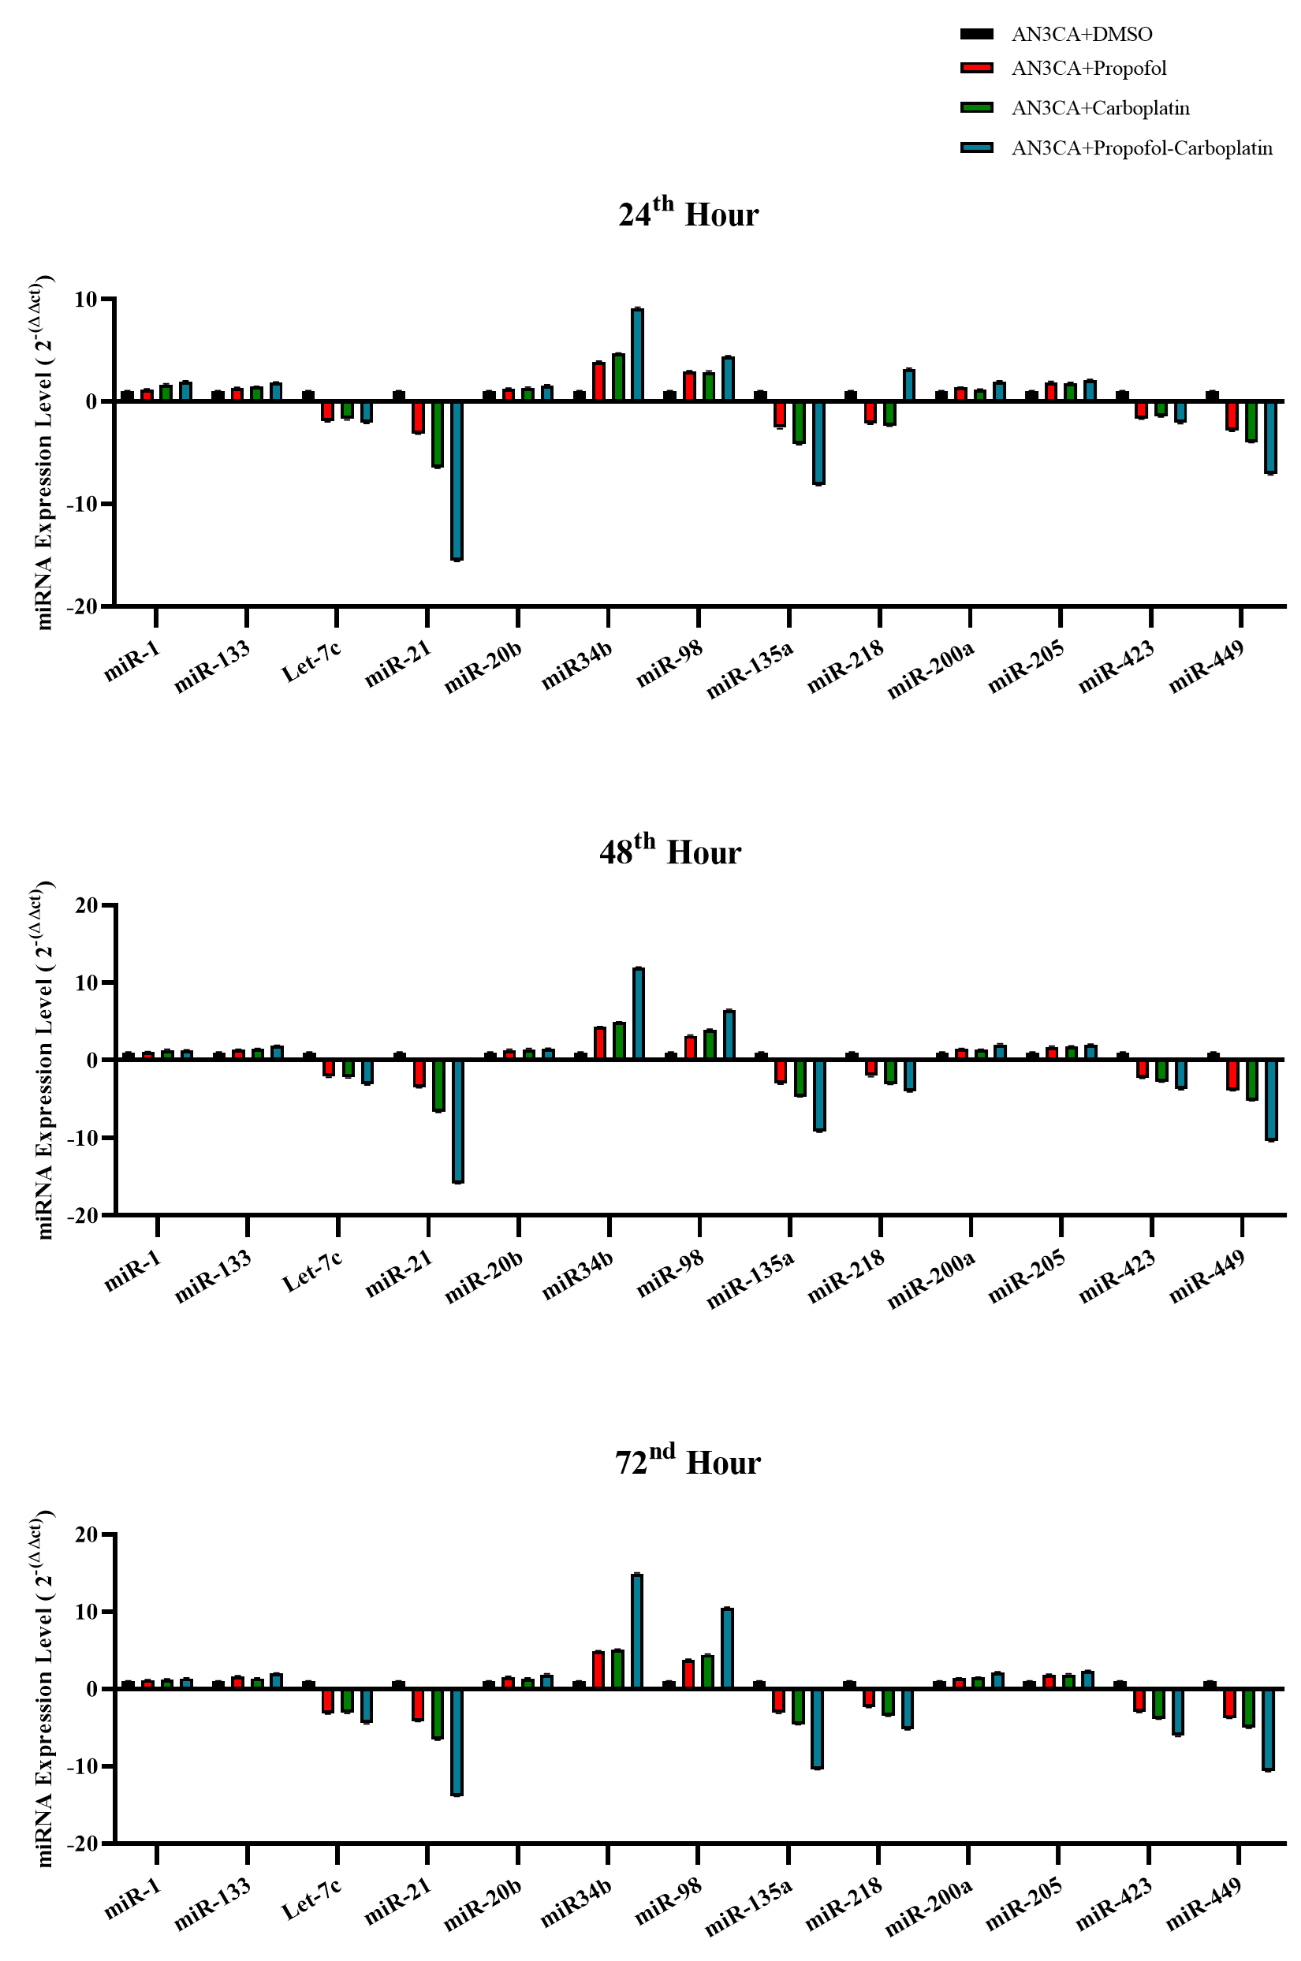
Figure S4.** RT-qPCR analysis of miRNA expression in AN3CA cells following propofol and carboplatin treatment. Time-course RT-qPCR analyses performed at 24, 48, and 72 h demonstrate treatment-associated modulation of miRNA involved in metastasis, drug resistance, and angiogenesis (Figure S2).
